# Supplementary material for: Medial anterior prefrontal cortex stimulation downregulates implicit reactions to threats and prevents the return of fear
Source: eLife. 2024 Jun 24;13:e85951. doi: 10.7554/eLife.85951 (PMC11196108; doi:10.7554/eLife.85951)
Supplement: Figure 2—figure supplement 2—source data 1. [file elife-85951-fig2-figsupp2-data1.xlsx]

## Sheet: ctrl discomfort_conditioning
subj	CS
	trial 1	trial 2	trial 3
1	0.34332	0	1.6571
2	0.47912	0.22277	0.17852
3	0.35858	0.28076	0.47607
4	1.03454	0.59661	0
5	0.31738	0.12817	0.4074
6	0.0534	0	0
7	0.07019	0.19531	0
8	0	0	0
9	0.23499	0.10986	0
10	0.1358	0	0

## Sheet: ctrl discomfort_US
subj	US
	trial 1	trial 2	trial 3	trial 4	trial 5	trial 6	trial 7	trial 8	trial 9	trial 10	trial 11	trial 12
1	0.54016	0.34943	0.37537	0.50964	0.60883	0.36621	0.51727	0.65613	0.54016	0.86365	0.83618	0.58289
2	0.36468	0.18005	0.16021	0.22735	0.25024	0.21514	0.18768	0.18615	0.23956	0.19378	0.24871	0.18157
3	0.71105	0.44097	0.4898	0.67443	0.81329	0.6134	0.71411	0.60272	0.67749	0.43334	0.63476	0.88043
4	0.76904	0.53558	0.53253	0.7431	0.6607	0.5661	0.66223	0.20141	0.89569	0.9201	0.81024	0.83923
5	0.45928	0.30364	0.40588	0.42419	0.45928	0.33721	0.38757	0.26702	0.45166	0.5371	0.43487	0.49133
6	1.49383	1.31835	1.26342	1.30004	0.68817	1.19628	0.90637	0.67749	1.00402	0.53405	0.69274	0.72784
7	0.32348	0.21057	0.21057	0.2655	0.1419	0.12512	0.20141	0.12054	0.20904	0.1358	0.13275	0.16937
8	1.01929	0.77057	0.97046	0.79193	0.06256	0.85754	0.62561	0.46844	0.53864	0.85144	0.51422	0.46997
9	0.54169	0.32501	0.45013	0.35095	0.3006	0.40131	0.34943	0.41046	0.25635	0.37079	0.55084	0.33569
10	0.51422	0.07477	0.14038	0.20294	0.16174	0.13428	0.32043	0.30365	0.36316	0.04883	0.13275	0.21362

## Sheet: ctrl discomfort_implicit test
subj	CS
	trial 1	trial 2	trial 3	trial 4
1	1.268	0	0.14495	0.17089
2	0.8728	0.38604	0.70037	0.36773
3	1.10168	0.71716	0.79193	1.31378
4	0.32043	1.05895	0.06103	0.46386
5	0.37841	0	0	0.52795
6	0.02441	0.04882	0.0885	0.12207
7	0	0	0	0
8	0	0	0	0
9	0.20599	0	0	0
10	0.52338	0	0.12207	0

## Sheet: ctrl discomf_implicit follow-up
subj	CS
	trial 1	trial 2	trial 3	trial 4
1	0.59967	0.21667	0.22888	0
2	0.43205	0.4721	0.38879	0.42831
3	0.1358	0.14495	0.02746	0
4	0	1.06964	0	0.03204
5	0	0.06561	0.5722	0.04577
6	0.15411	0.3189	0.25787	0
7	0	0.02289	0	0
8	0	0	0	0
9	0	0	0.07629	0
10	1.03073	0.53833	0.23659	0.17891
