# Supplementary material for: Medial anterior prefrontal cortex stimulation downregulates implicit reactions to threats and prevents the return of fear
Source: eLife. 2024 Jun 24;13:e85951. doi: 10.7554/eLife.85951 (PMC11196108; doi:10.7554/eLife.85951)
Supplement: Figure 2—source data 1. [file elife-85951-fig2-data1.xlsx]

## Sheet: sham_conditioning
subj	CS
	trial 1	trial 2	trial 3
1	0	0.23651	0
2	0.23193	0.13733	0.15411
3	0.88501	2.14691	1.2558
4	0.28381	0.39368	0.28706
5	0.39368	0.21667	0
6	0.35248	0	0
7	0.91858	0.88959	0.43488
8	0.16327	0.02289	0
9	0.92468	0.99335	0.37537
10	0.08087	0	0.02441
11	0	0.07019	0
12	0	0.03052	0.05188
13	0.69885	0.69427	0.05646
14	0.4776	1.45111	0.66071
15	1.01471	0.58746	0.10071
16	0.84991	1.30615	1.25275
17	0.41656	0.03662	0.03204
18	0	0	0.04425
19	0.16022	0	0
20	0	0	0
21	1.23901	0	0.31128
22	0.14954	0.06104	0
23	0	0.06714	0
24	0.94452	0.18158	0.03815
25	0.41504	0	0
26	0	0	0
27	0.28076	0.16327	0.31891
28	0.07629	0.03204	0.06561
29	0.09308	0	0.0351
30	0.05035	0	0

## Sheet: sham_implicit test
subj	NS1				CS				NS2				US2
	trial 1	trial 2	trial 3	trial 4	trial 1	trial 2	trial 3	trial 4	trial 1	trial 2	trial 3	trial 4	trial 1	trial 2	trial 3	trial 4
1	0	0	0	0	1.71204	1.90887	0	0	1.02692	0	0	0	3.48969	1.63574	1.16425	0.73853
2	0.18463	0.25177	0.08392	0.04425	0.39673	0	0.32196	0	0	0	0.23499	0	0.81329	0.32043	0.08698	0.03662
3	1.09253	0.91858	0.10834	0.88196	4.61578	2.005	0.75378	0	0	0.16785	0	0.36926	3.99628	2.21252	0	0.09308
4	0.84381	1.02692	0.27618	0.40436	1.18408	1.03607	0.42572	0.17853	1.09253	1.32904	0	0	2.14539	1.60675	1.28784	1.02997
5	0.57678	0.0412	0.1358	0	0	0.16479	0	0.14954	1.08643	0.80414	0.08392	0.44098	1.63422	1.19019	0.66528	0.62866
6	1.49384	0.66528	0.66528	0.10834	0.93231	0	0	0.10834	0.53558	0.35553	0.4425	0	1.95007	1.09253	0.15717	0.05798
7	0.55847	0.46997	0.2243	0.11292	0.75836	0.17853	0.33569	0	0.88348	0.58746	0.3952	0	1.38855	0.04272	0	0
8	0.23956	0	0	0	0.73395	0.40588	0.08392	0	0	0.02289	0	0	1.62354	0.20599	0.06714	0
9	0.67291	0.03967	0.29449	0.63782	1.16119	3.12805	0.38757	0	1.11084	1.21765	0	0.56305	2.34222	0.70801	0.31891	0.28839
10	1.1734	1.21002	0.33264	0.12817	1.08337	0.83313	0.61951	0.03204	0.9491	1.12762	0.89874	0.48523	1.06506		0.80261	0.0351
11	0.16937	0.0824	0.09003	0.10681	0.05035	0.03357	0.09308	0.21973	0.12512	0.14496	0.12512	0.06714	0.57068	0.11292	0.02136	0
12	0	0	0.02289	0.04578	0.06866	0.02747	0	0	0	0	0	0	0	0	0.02747	0.02594
13	3.125	1.67084	1.35193	1.28937	2.49786	2.63824	0.77667	0.14954	3.51257	4.25415	1.23291	0.83923	4.02832	1.50604	1.6922	1.50757
14	2.98462	1.71051	2.23694	1.09558	1.24054	3.29285	0.74768	1.50604	3.17841	1.42059	1.03607	1.11694	2.54364	0.89722	0.55237	1.17493
15	1.08643	0.34485	0.08698	0.05035	0.30212	0	0.87433	1.08795	0.7309	1.47705	1.42822	0	0.43182	0.13123	0.09155	0.53864
16	3.77045	0.77667	1.49384	0.90027	3.27454	0.60272	0.11139	0.19531	1.22223	0.2121	0.11139	0	3.19977	0.08392	0.28992	0.4776
17	0	0	0	0.05341	0	0	0	0.4425	0	0	0.08698	0	0.64392		0.3952	0.03357
18	0.06714	0.02441	0	0	0.05798	0	0	0	0	0	0	0	0.11749	0.04272	0	0
19	0	0	0	0.05951	0	0	0.14801	0.02899	0	0	0	0	0.25482	0.59662	0.87738	0.1358
20	0	0	0	0.0351	0.05035	0	0.03357	0.02289	0.03815	0	0.0412	0.0351	0.03815	0.04578	0.10681	0.03967
21	1.388	1.0376	0.05341	0	1.66473	1.16272	2.24152	0.11597	1.15204	1.83411	0.60577	2.57111	2.98309	1.83258	0.09918	0
22	0.02441	0.02899	0	0	0.0412	0.05646	0.02136	0.08698	0.20142	0.05188	0	0.04883	0.05341	0.81635	0.28687	0.05951
23	0.03052	0.0351	0.02136	0.07477	0	0.0473	0.02747	0.0473	0.02289	0	0.02594	0.02594	0	0.02289	0.05188	0.03052
24	0.02441	0	0.02899	0	0.11139	0.04425	0	0.02441	0.0412	0	0	0	0.02441	0	0	0
25	1.35956	0	0.03052	0	0	0.47302	0	0	0.60577	0.60272	0	0	1.50604	0.71411	0.19226	0
26	0.1297	0	0	0	0	0.16022	0	0	0.02594	0	0	0	0.03357	0	0	0
27	0.6958	1.01776	0.177	0.37994	0.86517	0.76294	0.37689	0.41962	1.26038	1.02692	0.69427	0.67444	0.78735	0.14801	0	0
28	0.45471	0	0.08698	0	0	0.05188	0.05035	0.38757	0.0824	0.02136	0.10681	0.06256	0.75073	0.61951	0.36163	0.16937
29	0.97198	1.40076	0.52948	0.44861	0.43182	2.54822	1.55792	1.1795	0.0946	3.1723	0.81482	0.81787	2.15149	1.19934	0.15564	0.7309
30	0.10529	0	0	0.0351	0.05798	0	0	0	0.05951	0	0	0	0.69885	0.11139	0.0473	0.08698

## Sheet: sham_implicit follow-up
subj	CS				US2
	trial 1	trial 2	trial 3	trial 4	trial 1	trial 2	trial 3	trial 4
1	0	0	0.09918	0.33417	1.99127	0.26703	0.02747	0.55389
2	0.34637	0.09003	0	0	1.14899	0.41046	0.28381	0.02136
3	0.09766	0	1.61285	0	2.45819	0	0	0
4	1.62048	0.76599	1.12915	0.0885	0.84686	0.54932	0.32806	0.10376
5	0	0	0.23956	0	2.28882	0.9964	0.63019	0.77667
6	0.8316	0.04272	0	0.08698	1.43127	0.24872	0	0
7	0.18921	0	0	0	0.29602	0	0	0
8	0	0.02594	0	0	1.28174	0.36926	0.06561	0.14954
9	0.74768	0	0	0	0.88806	0.57678	0.02747	0.02136
10	0.90027	0.46082	0.53864	0.22888	0.1358	0	0	0
11	0	0	0	0	0	0	0	0
12	0	0.02899	0	0	0.0473	0.58746	0	0
13	1.72882	0.70953	0.53864	0.03662	3.12958	1.45264	0.79956	1.46332
14	2.02332	1.17798	0.73242	0.75226	1.56097		0.72937	0.66376
15	0.62256	0.49286	0.93231	1.68915	0.53101	0.14801	0.14954	0.1236
16	1.81427	0.82855	0.39368	0.06866	1.48926	0.26093	0.33417
17	0	0.02594	0	0	0	0	0	0
18	0	0	0	0	0	0	0	0
19	0	0	0.04578	0.02899	2.43073	0	0	0
20	0.4425	0.42725	0.02289	0	0.05493		0.04425	0.05646
21	2.4765	0.06256	0	0.02289	2.36816	0.05493	0	0
22	0.06104	0.06866	0.02747	0.11444	0.14954	0.24414	0.11902	0.08545
23	0	0.02136	0	0	0	0.07019	0	0.0824
24	0.0351	0	0	0.02136	0.03815	0	0	0
25	0.70343	0.79651	0.13733	0	1.12762	0.31281	0	0
26	0.02441	0.05646	0	0	0.0412	0.02136	0	0
27	0.9491	1.05133	1.79901	0.3067	1.12457	0.46692	0.56305	0.07782
28	0	0.05798	0.18921	0	0.1709	0.07172	0.07172	0.10071
29	1.10168	0.14038	0.40436	0.02594	1.40076	0.83923	0	0.06714
30	0.09003	0	0	0	0.33875	0.46234	0.20294	0
