# Supplementary material for: Medial anterior prefrontal cortex stimulation downregulates implicit reactions to threats and prevents the return of fear
Source: eLife. 2024 Jun 24;13:e85951. doi: 10.7554/eLife.85951 (PMC11196108; doi:10.7554/eLife.85951)
Supplement: Figure 3—source data 1. [file elife-85951-fig3-data1.xlsx]

## Sheet: explicit_perceptual
explicit recognition test						explicit recognition follow-up						perceptual discrimination test						perceptual discrimination follow-up
subj	aPFC-E		sham-E			subj	aPFC-E		sham-E			subj	aPFC-E		sham-E			subj	aPFC-E		sham-E
	hit (%)	confidence	hit (%)	confidence			hit (%)	confidence	hit (%)	confidence			hit (%)	confidence	hit (%)	confidence			hit (%)	confidence	hit (%)	confidence
1	0.625	6.25	0.8125	9.4375		1	1	6.3125	1	9.8125		1	1	8.71429	1	10		1	1	9.28571	1	10
2	0.6875	6.1875	1	9.25		2	0.8125	6.5625	0.8125	8.0625		2	1	8.28571	1	10		2	1	8.28571	1	10
3	0.9375	8.5	1	9.3125		3	0.8125	7.5625	1	9.8125		3	1	9.28571	1	10		3	1	9.57143	1	10
4	0.9375	9.6875	0.9375	9.375		4	0.8125	9.1875	0.875	9.9375		4	1	10	1	10		4	1	9.71429	1	10
5	0.875	7.5625	0.9375	9.0625		5	0.9375	8.25	0.5	8.4375		5	1	8.57143	1	8.85714		5	1	9.85714	1	10
6	0.8125	8.375	0.8125	5.375		6	0.875	8.375	1	8.375		6	0.857143	9	1	9.71429		6	1	9.71429	1	9.57143
7	1	8.5625	0.6875	5.375		7	0.9375	9.8125	0.6875	6.4375		7	1	10	1	9.85714		7	1	10	1	10
8	0.75	7.1875	0.75	6.5		8	0.75	6.125	0.8125	8.5		8	1	10	1	9.42857		8	1	10	1	10
9	0.875	7.8125	0.9375	9.4375		9	1	9.4375	1	9.8125		9	1	9.57143	1	10		9	1	9.71429	1	10
10	0.5625	6.26667	0.9375	10		10	0.8125	6.375	0.875	9.875		10	1	10	1	10		10	1	10	1	10
11	1	9.9375	1	8.8125		11	1	9.875	1	8.9375		11	1	10	1	10		11	1	10	1	10
12	0.5625	7.75	1	8.1875		12	0.6875	6.1875	0.9375	9.5625		12	1	8.28571	1	10		12	1	8.71429	1	10
13	0.875	7.75	0.9375	6.875		13	0.9375	8.9375	1	8.375		13	1	10	1	8.85714		13	1	10	1	9.57143
14	0.875	7	0.8125	5.5625		14	0.875	8.3125	0.5	5.6875		14	0.714286	8.42857	1	8.42857		14	1	9.57143	1	7.57143
15	0.9375	7.9375	1	6.9375		15	1	9.4375	1	8.6875		15	1	10	1	10		15	1	10	1	10
16	0.6875	8.9375	0.875	6.3125		16	0.875	8.5	0.8125	6.1875		16	1	10	1	8.85714		16	1	10	1	6.85714
17	1	9.9375	0.75	6.4375		17	1	10	0.5625	4.5625		17	1	10	1	8.57143		17	1	10	0.857143	9.42857
18	1	9.625	0.625	7.375		18	0.875	9.3125	0.375	6.5		18	1	9.85714	1	9.42857		18	1	10	1	9.85714
19	0.9375	6.625	1	8.5		19	0.9375	5.8125	1	8.875		19	1	8.28571	1	9.57143		19	1	7.42857	1	9.57143
20	1	9.4375	0.6875	4.75		20	1	9.5625	0.5625	4.8125		20	1	9.28571	1	9.85714		20	1	9.71429	1	9.85714
21	0.5	6.375	1	6.8125		21	0.5	6.4375	1	10		21	1	10	1	9.85714		21	1	10	1	10
