# Supplementary material for: Medial anterior prefrontal cortex stimulation downregulates implicit reactions to threats and prevents the return of fear
Source: eLife. 2024 Jun 24;13:e85951. doi: 10.7554/eLife.85951 (PMC11196108; doi:10.7554/eLife.85951)
Supplement: Figure 4—source data 1. [file elife-85951-fig4-data1.xlsx]

## Sheet: OC_conditioning
subj	CS
	trial 1	trial 2	trial 3
1	0.83008	1.40076	0.3067
2	0.52948	0.54169	0.86975
3	0	0	1.32141
4	0.737	0.14343	0.42114
5	0.05493	0.6546	0.28534
6	1.94244	0.46082	0.03357
7	0.81635	0.49438	0.177
8	0.92163	0.0946	0.50812
9	0.0946	0	0
10	0.10681	0	0.19836
11	0.82855	0.43488	0.32501
12	0	0.73242	0
13	0	0	0
14	0.69122	0.5127	0.80109
15	0	0.05646	0
16	0.36011	0	0
17	0.16632	0	0
18	0.61035	0.23956	0.37384
19	1.09406	0.06256	0.59967
20	0.06714	0.04883	0
21	0.51574	0	0.04119
22	0.22583	0	0.07476
23	0.94451	0.14953	0
24	0.24261	0	0
25	0.13427	0.07934	0.04119
26	0.05188	0.14343	0
27	0.09918	0	0.10834
28	0.32196	0	0
29	0.21515	0.15106	0.10071
30	0.30365	0	0.03815

## Sheet: OC_implicit test
subj	NS1				CS				NS2				US2
	trial 1	trial 2	trial 3	trial 4	trial 1	trial 2	trial 3	trial 4	trial 1	trial 2	trial 3	trial 4	trial 1	trial 2	trial 3	trial 4
1	0.22583	0.15411	0	0	0.99335	0.14038	0.1236	0	1.29395	0.48828	0.3479	0.21667	1.25732	0.33722	0.18463	0.68207
2	0	0.03967	0	0	0.02899	0.46539	0.45776	0.02136	0	0.03662	0	0	1.13983	0.50507	0.15869
3	0.61951	0.16785	0.07935	0	0.7019	0.19073	0.05188	0.45929	0.6897	0	0.25482	0	0.85602	0.42267	0.61188	0
4	0.7019	0.34485	0.36011	0.15411	1.35498	0.04425	0.0412	0.97656	0.27313	0.82703	0	0.13275	1.0498	0.66986	0.07782	0
5	0	0.49286	0	0	0	0.33722	0.48218	0.02594	0.16022	0	0	0	0.95367	1.58691	0.31128	0.60272
6	0.72937	0.03662	0	0	0.61951	0	0.03815	0.03967	0.65308	0	0	0	2.69928	0.93079	0.99792	0.76904
7	1.14136	0.78125	0.07324	0.23499	1.58844	0	0.17395	0.84534	0.80719	0.92926	0	0	2.14386	0.53864	0.49133	0
8	0.41809	0.60883	0	0.10529	0.41046	0.26093	0.05646	0.0351	0.75684	0.18463	0.10376	0	0.23346	0.07629	0	0
9	0	0	0	0.02136	0	0	0	0.02594	0	0	0	0.0351	0.03204	0.05493	0	0.18616
10	0.87891	0.9079	0	0	0.24109	0	0	0	0	0.31433	0.02136	0	3.21808	0	0.07477	0
11	0	0	0	0	0.58441	0.02441	0	0	0.09155	0.10834	0	0	0.57373	0.17853	0.06714	0
12	0	0	0	0.03204	0.09003	0	0	0	0	0.04272	0	0	1.94855	0.83771	0	0
13	0.07782	0.05646	0	0	0.05493	0.09766	0	0	0.1358	0.12817	0.06409	0		0.3418		0.24109
14	0.2533	0.24261	0.28839	0.02594	0.61646	0.15869	0.17395	0.4837	0.23651	0.43182	0.06866	0	0.82092	0.65765	0.40894	0.03357
15	0.05188	0	0	0	0.12054	0	0	0	0	0	0	0	1.64337	0.14191	0	0
16	0	0	0.26703	0	0.20447	0	0	0.05646	0	0	0	0	0.18311	0	0	0
17	0	0	0.05341	0	0	0.26398	0	0	0.08392	0.02136	0	0	0.24414	0.03204	0.03662	0.13428
18	0.69733	0.87585	0.50964	0	0.63629	0.0412	1.43585	0	0.66376	0.3952	0	0.19531	1.34888	0.2594	0.28839	0.43793
19	1.4267	2.51465	2.39716	0.737	1.63269	1.59302	0.48065	3.85437	1.64948	0.64545	0.45776	0.4303	4.3457	0.0351	1.08948	0.13428
20	0.59814	0.37842	0.40283	0.27008	0.75836	0.77667	0.4837	0.58594	0.45776	0.5661	0.53101	0.63324	0.68207	0.34332	0.16327	0.11292
21	0.4303	0.42572	0	0	0	0.33569	0	0.30822	0.46997	0.03356	0.14801	0	1.19018	0.66223	0.6668	0.19683
22	0.09307	0	0.02288	0	0	0.02136	0	0.06866	0	0	0	0	0.29907	0.04577	0	0.03356
23	0.65917	0	0.24566	0.08392	0.73852	0.51116	0.67749	0.02288	1.2268	0.12359	0	0	2.69317	0.64697	0.55389	0.19683
24	0.91094	0.04425	0	1.87988	0.19683	0.1419	0	1.02844	0.31738	0.13275	0.11596	0	0.97351	0.21362		0.84838
25	0	0	0	0	0.03509	0	0	0	0	0	0	0	0.0473	0.02593	0	0
26	1.3443	0.03204	0.02441	0	0	0.37537	0.3952	1.12152	0.03662	0.14496	0.45929	0.58594	1.74408	2.12097	0	0
27	0.88806	0	0.60272	0.27924	0.61188	0.19073	0.23804	0	0.12512	0	0.02136	0.06256	0.52643	0.76752	0	0
28	0.8194	0.65613	0.2121	0.15717	0.66681	1.0437	0.02899	0.86517	0.65308	0.50659	0.177	0	0.54779	0	0	0.06256
29	0.21667	0.23651	0.26398	0.4425	0.30365	0.03052	0.354	0.07172	0.18768	0	0.12054	0.24414	0.49744	0.20924	0.15564
30	0.84534	0.0351	0	0	0.87891	0	0	0	0.08087	0	0	0	1.01929	0.75989	0.40588	0.91095

## Sheet: OC_implicit follow-up
subj	CS				US2
	trial 1	trial 2	trial 3	trial 4	trial 1	trial 2	trial 3	trial 4
1	0.11749	0	0	0.02289	0.5117	0	0	0
2	0.12817	0	0	0	0.383	0.07477	0.06714	0
3	0.29144	1.3031	0.19989	0.37079	1.18713	0.02594	0.38147	0
4	0.4303	0.16937	0.0885	0	0.52032	0.18005	0	0
5	1.03149	1.50299	0.07019	0	0.15106	0	0	0
6	0.45624	0	0	0	7.29065	3.7262	2.76031	1.71661
7	0.16937	0.65002	0	0	1.38702	0	0.12054	0
8	0.09766	0.09308	0	0	0.15411	0.22583	0	0.07629
9	0	0	0	0	0.03815	0.0824	0	0
10	0.3891	0.02747	0	0	2.9953	1.0498	0	0
11	0.23804	0	0	0	0.7019	0	0	0
12	0.16632	0.02747	0	0.05341	0.80261	0.0412	0.0473	0
13	0.06409	0	0	0	0.0473	0.02136	0	0
14	0.26703	0.67902	0.26245	0.03204	1.02081	0.24872	0.12817	0.25635
15	0	0	0	0	1.85394	0	0	0.80719
16	0.03052	0	0.40131	0	0	0	0.59814	0.14191
17	0	0	0	0	0.30975	0.23651	0	0
18	0.11292	1.14746	0.15869	0.82855	1.57623	0.05646	0.05188	0.2533
19	2.28882	2.34833	0.47607	1.10168	2.3941	1.34583	0	0.06714
20	0.24872	0.80414	0.47455	0	0.54016	0.02594	0	0
21	0.91552	0.05035	0	0.7843	1.21459	0	0	0.4425
22	0	0.09613	0.05493	0	0.09765	0	0.0559	0.04882
23	0.06103	0	0.83312	0.37994	1.05743	0.78277	0.46081	0.3189
24	0.16326	0.06103	0	0	0.59204	0	0	0.58593
25	0.42572	0.36163	0.41962	0.05493	0.75378	0.43335	0.09003	0.07172
26	0	0	0	0.03662	0.97504	0.02594	0	0
27	0.10071	0	0	0	0.4715	0	0	0.0824
28	0	0	0	0	0	0	0.09918	0
29	0.10071	0.11749	0.11902	0.10681	0.28687	0.20905		0.23041
30	0.6485	0.06714	0.0885	0	0.62561	0.06256	0	0
