# Supplementary material for: Medial anterior prefrontal cortex stimulation downregulates implicit reactions to threats and prevents the return of fear
Source: eLife. 2024 Jun 24;13:e85951. doi: 10.7554/eLife.85951 (PMC11196108; doi:10.7554/eLife.85951)
Supplement: Figure 5—source data 1. [file elife-85951-fig5-data1.xlsx]

## Sheet: dlPFC_conditioning
subj	CS
	trial 1	trial 2	trial 3
1	0.30365	0.05646	0
2	0	0	0
3	0.22583	0	0
4	1.77307	0.12207	0.05035
5	0.10529	0.05798	0
6	0.75836	0.67291	0.43945
7	0.87585	0.06561	2.07977
8	0	0.02289	0
9	0	0.02136	0
10	0	0.24567	0.54169
11	0	0	0
12	0.78583	0	1.02386
13	0.94147	1.02692	1.12457
14	0	0	0
15	0.5127	0.14191	0
16	0.0885	0.09003	0
17	0.02136	0	0.03815
18	0.26855	0.18005	0.07629
19	0	0.14496	0.05188
20	0	0	0
21	0.07324	0	0
22	0.75073	0.61798	0.97198
23	0.85906	0.3952	0.22735
24	0	0.20294	0.23345
25	0	0	0.13733
26	0.09003	0.15411	0.08545
27	0	0.19989	0.18768
28	0.23193	0	0.12817
29	0.95215	1.3855	0.63477
30	0.09155	0	0

## Sheet: dlPFC_implicit test
subj	NS1				CS				NS2				US2
	trial 1	trial 2	trial 3	trial 4	trial 1	trial 2	trial 3	trial 4	trial 1	trial 2	trial 3	trial 4	trial 1	trial 2	trial 3	trial 4
1	0	0	0.09613	0	0	0.4776	0	0	0.04578	0	0	0.05951	0.39063	0.15869	0.36621	0.02136
2	0.24719	0.23346	0	0.12665	0.10834	0.08087	0.0946	0.11292	0.11139	0.06561	0	0.03967	1.30768	0.71106	0.8728	0.0946
3	0.0824	0	0	0	0	0	0	0	0	0.29755	0	0	0.48065	0.73547	0.25635	0.05493
4	3.70331	1.38702	1.41449	0.32043	4.68903	5.76019	3.08685	0.35858	1.17493	1.06201	0.49438	1.16272	2.36664	0.21973	1.20392	0.67444
5	0	0	0.27466	0	0	0.2243	0	0.15259	0	0	0	0	0.9964	1.00098	0.32959	0
6	0.02594	0.11902	0	0.07324	0.02899	0.20599	0.18768	0.0351	0.18463	0	0	0	0.58594	0.30212	0.07324	0
7	2.09808	1.43738	0.4425	0.02594	2.56195	2.88849	0.13275	0.15869	1.28326	0.46844	1.02081	0.15869	2.68707	1.7746	0	0.0351
8	0	0	0	0	0	0	0	0	0	0	0.07629	0	0.66681	0.4776	0.11292	0
9	0	0	0.25787	0.03967	0	0.04578	0.43945	0.63934	0.02289	0.05035	0.03204	0.57831	1.50452	0	1.12152	1.78528
10	0.20294	0.11597	0	0	1.02386	0	0	0	0	0.36774	0.51117	0.79041	2.31781	0	1.10626	0.42572
11	1.76392	0	0	0.0351	0.86823	0	0	0	0	0	0	0	2.74811	0.06104	0.09613	0.05646
12	1.36566	0.3891	0.20447	0	1.53351	0.61951	0.43335	0	0.09155	0.0535	0.02441	0	4.81262	2.83051	2.26746	1.76086
13	0.73242	0.6272	0.61951	0.55237	0.37842	0.81177	0	0.47455	0.31891	0.10376	0.61493	0.18005	0.86212	0.6073	0.34332	0.18311
14	0.28076	0	0	0	0.26245	0	0	0	0.37537	0	0	0			0.51422	0.50354
15	1.66799	1.67694	1.14746	0.86823	0.64087	1.18866	1.75018	1.63879	2.24304	1.74866	1.17493	0	4.10614	2.05231	1.54724	1.78986
16	0.10529	0.17395	0.26093	0.25482	0.28076	0.383	0.48981	0.24109	0.0824	0.25024	0.37537	0.27313	1.48163	1.11237	0.40741	0.73242
17	0.07629	0.07172	0	0	0	0	0.50507	0.83008	0.08698	0	0	0.1709	0.74615	0.0351	0	0
18	0.65613	0.07629	0	0.03662	0	0.53711	0.04272	0.1297	0.46387	0	0.20447	0.26703	1.14899	0.45624	0.62103	0
19	0	0.02899	0.16479	0.07935	0	0.02899	0.2243	0.16632	0.22888	0	0	0.08087	2.49481	1.2207	0	0
20	0	0.02136	0	0	0.03357	0	0.06714	0	0	0.10223	0	0.05188	0.15564	0.02441	0	0
21	0.31128	0.6012	0.88501	0	0.19379	0.09003	0.05493	0	0.39368	0	0.19073	0	1.07422	0.35706	0.94452	0.03357
22	0.95367	0.4013	0	0	1.41754	0.06103	0.04577	0.20294	4.02221	1.63574	0	0	0.98419	0.82702	0.38909	0.0885
23	0.8255	0.37078	0.38146	0.42114	1.04675	1.76544	0.57983	0.84228	0.53711	0.68511	0.64849	0.25024	0.52947	0.3189	0.03356	0
24	0.35247	0.24719	0	0	0.25329	0.20446	0.02746	0.10528	0	0.04425	0.04425	0	1.57318	0.91705	0.2777	0.26092
25	0	0	0	0	0.03967	0	0	0	0	0	0	0		0.57373	0.26093	0.38605
26	0.53711	0.32654	0.4303	0	0.40894	0.24414	0.89264	0.07324	0.25482	0.3891	0.22736	0	1.26648	0.32349	0.13428	0.67139
27	0.8606	1.27106	0.54474	0.70648	0.49286	0.33875	1.08643	0.15564	0.43793	0.73395	0.56763	0.52185	0.66528	0.34027	0.20447	0.22736
28	0	0	0	0.07629	0	0	0	0.1297	0	0	0	0.08392	0.47913	0.38452	0.18616	0.06866
29	2.40173	2.02179	0.08392	0	3.25623	2.57263	0.40741	0.86823	0.48981	1.06659	0.37537	0	2.39563	1.32599	1.36108	0.30975
30	0.03204	0.03357	0.11749	0.07629	0.11749	0.31433	0.07019	0	0.31738	0.07935	0.04272	0.33264	0.77362	0.0885	0.05798	0.02441

## Sheet: dlPFC_implicit follow-up
subj	CS				US2
	trial 1	trial 2	trial 3	trial 4	trial 1	trial 2	trial 3	trial 4
1	0	0	0	0	0.58136	0.3479	0.21515	0.0473
2	0.19531	0.23804	0.3418	0.33264	1.35956	0.66376	0.83923	0.90637
3	0	0	0	0	0	0	0	0
4	5.77545	2.82288	1.6037	0.46997	1.58844	0.76294	1.22223	0.94604
5	0	0.02441	0.35858	0	0.63629	0.16327	0	0
6	0.14343	0.14038	0	0.0412	0.35248	0.18921		0
7	1.22528	0.51117	0.07019	0	2.84271	0.46844		1.87531
8	0.05035	0.34485	0.34943	0.12665	1.32446	0.67749	0.02899	0.0412
9	0.09155	0	0.0351	0	0.02441	0.02136	0.0412	0.1236
10	0	0.31128	0.02594	0	1.19934	0.45624	0.09613	0
11	0	0	0.06256	0	0.63782	0.15717	0	0
12	0.74921	0.32196	0	0	2.22473	1.48926	1.66931	1.20544
13	2.05688	0.89417	0.72937	0.28381	1.97601	1.87073	0.05951	0.14954
14	0	0.10529	0.03537	0.05789	1.32751	0	0.04272	0.06104
15	1.05743	0.28229	1.12915	0.92773	2.75116	1.60522	1.83258	1.66016
16	0.1358	0.27924	0.10681	0.17853	1.24207	0.12054	0.32806	0.48065
17	0.25482	0.03967	0	0	0.54932	0.28381	0.03357	0
18	0.56458	0.53711	0.02441	0.03662	1.66168	0.66376	0	0.07172
19	1.39008	0.19531	0	0.08392	1.74255	0	0.27161	0
20	0	0.08545	0	0.03967	0.28534	0	0.17242	0.03357
21	0	0	0	0	0	0	0	0
22	0.44555	0	0	0	0.08392	0.0534	0.03662	0.06713
23	1.53656	1.30462	0.98724	0.34179	0.57525	0.13885	0.20599	0
24	0.14648	0	0.26092	0.10833	1.14593	0.85601	0.1831	0.46844
25	0.0946	0.41962	0	0.04425	2.03857	1.02692	0.69885	0.914
26	0.39673	0.28229	0.22736	0.21667	0.49591	0.35858	0.28839	0.03357
27	0.66833	0.45319	0.90332	1.00555	0.48218	0	0.22125	0.0412
28	0	0	0	0	0	0	0	0
29	4.91028	0.42419	0	0.29449	2.64282	2.60162	0.65155	0
30	0.02594	0.63629	0.03357	0.66071	1.04218	0.1297	0.49286
