# Supplementary material for: Medial anterior prefrontal cortex stimulation downregulates implicit reactions to threats and prevents the return of fear
Source: eLife. 2024 Jun 24;13:e85951. doi: 10.7554/eLife.85951 (PMC11196108; doi:10.7554/eLife.85951)
Supplement: Source data 1. [file elife-85951-data1.xlsx]

## Sheet: aPFC_conditioning
subj	CS
	trial 1	trial 2	trial 3
1	0.3952	0.07324	0
2	0.71716	0	0.02441
3	0.27313	0	0
4	1.27716	1.92108	1.47095
5	1.4328	0.13428	0.49133
6	1.19019	0.59204	0.43945
7	0.89111	0.45471	0.61035
8	0.48828	0	0.1236
9	0.63782	0	0
10	0.09003	0.15259	0.0946
11	0.8255	0.27008	0
12	0.3891	0	0
13	0	0	0.03662
14	1.32141	0	0.20142
15	0.29755	0	1.2207
16	0	0	0
17	0	0	0
18	0.89417	0	0
19	0.45776	0.82397	0.26855
20	0	0.0412	0.06866
21	0.38452	0.44861	0.51575
22	0.89722	1.01776	0.67139
23	1.22986	0.53406	0.57526
24	0.0473	0.02594	0
25	0.25024	0.25024	0.24261
26	0.63477	0.70496	0.44861
27	0.36469	0.24872	0.13428
28	0.19531	0	0
29	0.15259	0.02136	0
30	0	0	0.64392

## Sheet: aPFC_implicit test
subj	NS1				CS				NS2				US2
	trial 1	trial 2	trial 3	trial 4	trial 1	trial 2	trial 3	trial 4	trial 1	trial 2	trial 3	trial 4	trial 1	trial 2	trial 3	trial 4
1	0	0	0	0	0.10834	0	0	0	0	0	0	0	0.3952	0.16022	0.21362	0.05035
2	0	0	0	0.04883	0.11597	0	0	0	0.63629	0	0	0	1.35956	0.0946	0.03204	0.24719
3	0.09155	0	0	0	0.03815	0	0	0	0	0	0	0	0.06714	0	0.21057
4	1.66168	2.23541	3.30658	1.1795	2.56653	1.49231	0.06104	0.2121	0.82092	1.34277	0.12665	0.78583	4.10156	2.46735	0.16174	1.5213
5	2.58484	1.40228	0	0	1.06964	2.4353	0.4837	0.23346	3.08533	0	0	0.06256	7.84912	2.87781	2.98615	3.14026
6	0.59967	0.20599	0	0	0.50354	0.48218	0	0	0	1.22681	0	0	2.32239	0.22736	0.63171	1.05591
7	0.4364	0.56152	0.97351	0.18768	0.58594	1.08032	2.11945	0.67902	1.38245	2.1759	0	1.84937	4.49982	2.49939	1.73798	0.12817
8	2.72064	1.74103	0.1236	0.02594	3.19977	0.03357	0.31128	0	2.21863	2.6123	0.53558	0.03204	2.80151	3.98102	0	1.62201
9	0	0	0.0946	0	0	0	0	0	0	0	0.03357	0.03815	3.05786	2.02942	0.89264	0
10	0.29755	0.2121	0.13123	0.02594	0.1236	0	0.12512	0	0.32959	0.23651	0.14191	0.03357	0.15869	0.06561	0	0
11	0	0	0	0	0	0.83618	0	0	0	0	0	0	0.73547	0.03662	0	0
12	0.02747	0	0	0	0	0	0	0	0.06409	0	0.2121	0.10834	1.62811	0.90332	0	0
13	0.03204	0	0	1.09558	0	0	0	0	0.16174	0	1.01471	0	2.61841	1.03149	0	0
14	0.26856	0.15575	0	0.02176	0.21903	0.1214	0	0.05154	0.10624	0	0.16234	0	4.23737	2.95715	0.07477	0
15	0.30975	0.3067	0.16327	0.16022	0.40126	0.38574	0.36163	0.34637	0.58441	0.35553	0	0.19226	0.99487	0.96741		0.10681
16	0	0	0	0	0	0	0.03357	0	0	0	0	0	0	0	0	0
17	0.33722	0.14648	0	0	0.06256	0.04883	0.02747	0	0.0824	0.07782	0	0	0.05188	0.02747	0	0.13428
18	0.07629	0	0	0.07172	0.04272	0.02441	0	0	0	0	0	0.02441	0.50964	0.59662	0.14343	0.40283
19	0	0.04272	0	0.02594	0	0	0.02594	0.02136	0	0	0.02441	0	0.18768	0.07782	0.02136	0
20	0	0.05493	0	0.06409	0	0	0.02747	0	0	0	0	0	0	0.16785	0	0.02747
21	1.77002	0.50201	0.92926	0.32501	0.57068	0.43793	0.29144	0	0.51727	0.3067	0.05188	0.3418	1.62811	0.82855	1.00403	0.53864
22	0	0	0.04272	0	0	0	0	0	0.17242	0	0.02136	0	1.71204	0.96893	0.62103	0.12665
23	0.90027	0	1.41296	0	2.15607	0.11139	0.3479	0	4.27246	3.49884	0	0	0.3891	0	0.56458	0
24	0.03662	0.13428	0.05646	0.02441	0	0.0885	0.19989	0.03662	0.02747	0	0.09308	0	0.73547	0	0.24261	0
25	2.14385	0.66375	0	0.76599	1.31225	0.13732	0.05035	0.03051	0.43793	0.32653	0.21209	0.04425	2.07061	0.42114	0.02593	0.12359
26	0.47607	0	0.5722	0.41809	0.31738	0.09155	0	0.11902	0	0	0	0.32959	1.08948	0.91705	0.26398	0
27	0.02441	0.05035	0.30975	0.4364	0.21667	0.05646	0.46997	0.08087	0.36469	0.05798	0.20599	0.20905	0.86975	0.09918	0.05188	0.13733
28	0.02289	0	0	0.02289	0	0	0	0.02136	0	0	0	0	0.03357	0	0	0
29	0.14191	0.59967	0.58594	0.15869	0.85144	0.0351	0.33112	0.16875	0.16632	0.72021	0.3891	0.0885	2.33765	1.47247	0.98267	0.06561
30	0	0	0	0	0.07172	0	0	0	0	0	0	0				0.29907

## Sheet: aPFC_implicit follow-up
subj	CS				US2
	trial 1	trial 2	trial 3	trial 4	trial 1	trial 2	trial 3	trial 4
1	0	0.03052	0	0	0.16174	0.42877	0.13733	0.1358
2	0	0	0.04272	0	0.03357	0	0.06104	0
3	0	0	0	0	4.15802	0.31738	0	0
4	0.50964	1.03149	0.06409	0.22278	3.88641	2.28882	1.02234	1.98212
5	1.56555	0	1.41602	0	3.33862	2.43225	0.79193	0.22583
6	0.05646	0	0	0	0.79346	0.10834	0	0
7	0	0	0	0	1.73492	0.03204	0	0.46539
8	1.48621	0.60577	0	0	3.32642	1.72119	2.00806	0.91705
9	0	0	0	0	2.13623	1.0849	0.23804	0.34027
10	0.2182	0.17242	0.09003	0	0.41046	0	0.02136	0
11	0	0	0.09613	0	1.77917	1.24054	1.66168	0.04883
12	0.177	0.08087	0	0.23651	1.36414	0.82855	0.09308	0
13	0.11597	0.06409	0	0	2.96783	0.65918	0.20905	0
14	0.08545	0.20447	0	0	0.86975	0.03662	0	0.07019
15	0.64392	0.12512	0	0.06714	0.8728	0.71411	0.02899	0.65002
16	0	0	0	0	0	0	0	0
17	0	0	0	0	0	0.05493		0
18	0.11139	0.08698	0.08392	0.03815	0.33569	0.53253	0.2182	0.10071
19	1.58081	0	0	0	0.97046	0.14648	0.2243	0.07019
20	0.22583	0.05341	0	0	0.5127	0.09766	0.81329	0.07629
21	1.09253	0.67444	0	0.07629	1.75476	0.2182	0.04425	0
22	0.03815	0	0	0.05341	1.44196	0.07782	0.13123	0.04883
23	0.06104	0.28299	0	0.02747	0.52643	0.177	0.67444	0.04578
24	0	0	0	0.03967	0.26245	0	0	0.10986
25	0.15869	0.16632	0	0	0.90637	0.05798	0	0.06409
26	0.10376	0.14038	0.14038	0.0473	0.38147	0.26245	0.17242	0.24109
27	0.15869	0.08392	0	0	0.45319	0	0	0
28	0	0	0	0	0	0	0	0
29	0.34943	0	0	0.02899	0.5188	0	0	0
30	0	0	0.06104	0	1.23749	0.28229	0.0351	0
