# Supplementary material for: Medial anterior prefrontal cortex stimulation downregulates implicit reactions to threats and prevents the return of fear
Source: eLife. 2024 Jun 24;13:e85951. doi: 10.7554/eLife.85951 (PMC11196108; doi:10.7554/eLife.85951)
Supplement: Source data 2. [file elife-85951-data2.xlsx]

## Sheet: CS_precond
subj	aPFC				sham				OC				dlPFC
	Trial 1	Trial 2	Trial 3	Trial 4	Trial 1	Trial 2	Trial 3	Trial 4	Trial 1	Trial 2	Trial 3	Trial 4	Trial 1	Trial 2	Trial 3	Trial 4
1	0.04235	0.04367	0	0.02278	0.27466	0	0	0.04578	0.5127	0.32501		0.58441	0.03287	0.03916	0.03478	0
2	0.02493	0.07095	0.0351	0	0	0.13275	0.04578	0.05493	0.24109	0	0	0	1.24512	1.03149	0.3952	0.23956
3	0.62561	0.54169	0.14191	0	1.01624	0.02441	0.06409	0.21667	0	0.11749	0.0885	0.08698	0.04748	0	0.03239	0.02816
4	1.14594	0.6958	0.10529	0.16632	0.22736	0.13428	0.04272	0.22888	0	0.08545	0			0.65918	0.1709	0.46692
5	1.98669	0.57678		1.9516	0.31281	0.16632	0	0.15717	0.38452	0.14038	0	0.04758	0.64697	0	0.33417	0.28076
6	0.6134	0	0.30212	0	0.13428	0.13123	0.02594	0	0	0.0473	0	0	0.4715	0	0.18311	0.15717
7	0.72021	0.39978		0.61035	0.32349	0	0	0	0.08545	0.14496	0	0.04883	1.66016	0.76904	0.24719	1.45874
8	2.29645	0.56	0.37079	0.11749	0.2121	0	0.06256	0.04425	0.65613	0	0.33417	0.05646	0	0.0351	0
9	0	0.03898	0.02493	0.04425	0.88196	0.46997	0.37842	0.12512	0	0.03815	0	0	0.20752	0	0	0
10	0.37231	0	0.07935	0.09003	0.50812	0	0	0.08087	0.03593	0	0.05035	0.02303	0.83771	0.36926	0.23651	0.30975
11	0.08698	0.16937	0.02594	0	0.03855	0.03404	0.03416	0	0.07324	0.0412	0.03815	0	0	0	0.11749	0.03357
12	0.80261	0	0.14496	0.09613	0.07019	0.11597	0.23956	0.30975	0.94452	0.02594	0.07172	0.03357		0.25635	0	0.09003
13	0.10681	0.0885	0.15869		2.15607	0.83618	0.20905	0.36774	0.03187	0.04346	0	0.03193	0.24567	0.0412	0	0.03204
14	0.04748	0.03447	0.02629	0	0.62103	0.4837	0.31738	0.45319	0.12817		0.14038	0.05188	0.20447	0	0	0
15	0.37231	0.15564	0.02747	0	0.34943	0	0.04425	0.03052	0.20905	0	0	0	0.69427		0.09918	0.11902
16	0.06409		0	0	1.10474	0.03815	0	0.20294	0.04793	0.02491	0.03569	0	0.28992	0.10071	0	0.15564
17	0.12207	0.07629	0	0	0.3006	0.03052	0	0	0.09766	0	0	0	0.4715		0	0
18	0.17548	0.05188	0	0.02441	0.04593	0	0.03776	0.02466	0.05035	0.03204	0.04425	0	0.32501	0.05341	0.2533	0
19	0.02441	0.02289	0	0	0		0	0.07782	0.4364	0.22736	0.46082	0.41199	0.52185	0.59052	0.56458	0.13885
20	0.11749	0	0.16022	0.03204	0.053612	0.03603	0	0.02083	0.03916	0.03197	0	0.03572	0	0	0.07629	0
21	1.09558	0.55084	1.01166	0.42267	0.23956	0	0	0	0	0	0	1.03149	0.03815	0	0	0
22	0.14496	0.1236	0.02899	0	0.14496	0	0.0351	0.02441	0.0473	0	0.06103	0	0.37689	0.02899	0	0.12512
23	0.64087	0.30212	0.19684	0.02747	0.03204	0	0	0.02594	0.38299	0.06256	0.0595	0.52642	0.03051	0.06713	0.05798	0
24	0	0.06561	0	0.06561	0.16937	0	0	0	0.23956	0.04272	0.02441	0.07629	0.54321	0.31433	0.12817	0.21362
25	0.26702	0.02441	0	0.04882	0.14343	0	0	0	0		0.177	0.18463	0.54016	0.15016	0.11444	0.05951
26	1.10779	0.39063	0.0473	0.20572	0.383	0	0	0	0.71411	0	0	0.05798	0.23804	0.03052	0.12665	0.09308
27	0.42419	0.30212	0.09003	0.08698	0.08392	0.29449	0.07019	0	0.07935	0.04425	0.02899	0	0.34485	0.13428	0	0.13885
28	0	0	0	0	0.24719		0.27466	0.07324	0.03967	0		0	0	0	0	0.0351
29	0.24872	0.27008	0	0	0.05035	0.02899	0	0	0.03815	0.02594	0	0	0.57983	0.09613	0	0
30	0	0	0	0	0	0.04883	0	0	0.66223	0.21667	0.31586	0.06104	0.3479	0	0.03357	0.07782

## Sheet: US_cond
subj	aPFC												sham												OC												dlPFC
	Trial 1	Trial 2	Trial 3	Trial 4	Trial 5	Trial 6	Trial 7	Trial 8	Trial 9	Trial 10	Trial 11	Trial 12	Trial 1	Trial 2	Trial 3	Trial 4	Trial 5	Trial 6	Trial 7	Trial 8	Trial 9	Trial 10	Trial 11	Trial 12	Trial 1	Trial 2	Trial 3	Trial 4	Trial 5	Trial 6	Trial 7	Trial 8	Trial 9	Trial 10	Trial 11	Trial 12	Trial 1	Trial 2	Trial 3	Trial 4	Trial 5	Trial 6	Trial 7	Trial 8	Trial 9	Trial 10	Trial 11	Trial 12
1	0.84534	0.177	0.15717	0.19836	0.30823	0.2533	0.38147	0.39978	0.50812	0.44861	0.6485	0.48981	1.24512	1.59454	1.42822	1.21918	1.40381	1.17188	1.19629	1.49689	1.17493	0.98724	0.99792	1.15814	1.89667	1.25732	0.55237	1.474	1.3382	1.21155	0.21973	1.39923	1.54419	0.95215	0.6958	0.79803	0.14191	0.77972	0.65918	0.81787	0.354	0.2655	0.11292	0.41809	0.33875	0.03662	0	0.17242
2	1.94855	1.44501	1.08337	2.03247	1.68915	1.54419	1.828	1.69525	1.18408	1.7395	1.297	0.30365	0.88806	0.3006	0.62866	0.72327	0.29602	0.37994	0.37231	0.58289	0.29602	0.5661	0.86365	0.18005	1.73645	1.44501	1.49994	1.84784	1.74255	1.75629	1.27106	1.29395	1.70746	1.63727	1.61438	1.80054	1.55182	1.01013	1.06812	1.10626	0.88196	1.17645	1.04065	0.54626	0.56915	0.54932	1.07117	0.73242
3	4.65393	3.5965	3.08228	3.66974	2.33002	4.07867	3.45917	4.32739	4.09698	4.01306	3.46375	4.15649	2.77252	1.37482	1.05896	1.59454	1.48926	0.97504	1.47095	1.32751	0.98724	0.1358	1.6861	1.16272	1.4389	0.38757	0.89874	0.73395	0.07324	0.79651	1.24207	0.6012	1.99127	1.7746	1.88293	1.82343	0.93231	0.74768	0.86517	1.10474	0.71869	0.67902	0.87738	0.65155	0.78583	0.40894	0.62561	0.42725
4	6.08826	1.88904	1.91345	2.71454	2.61383	3.32489	2.16217	1.56555	2.77557	2.11487	2.48871	2.11182	1.36414	0.66681	0.38605	0.77057	0.70801	0.71869	0.71259	0.52795	0.83466	0.55084	0.77057	0.92163	1.78375	0.35095	0.61188	0.58899	0.27771	0.4425	0.44098	0.5722	0.65308	0.75836	0.65918	0.67902	2.31628	0.65308	0.41962	1.81427	1.71356	1.44043	1.05743	2.47498	2.66113	2.01874	2.31171	1.66168
5	4.27704	1.35803	1.5625	2.39716	1.86768	1.3855	1.76544	2.14691	1.72882	1.79749	1.04828	1.93024	1.84937	0.75684	0.45776	1.13068	1.11237	1.29547	0.82855	0.8316	1.14594	1.15662	1.39008	1.31226	1.02997	0.38757	0.72479	0.70343	1.13068	0.86212	0.83771	0.78583	0.65918	0.63171	1.26495	1.3382	0.914	0.52338	0.52032	0.74768	0.60425	0.40741	0.4837	0.30823	0.73547	0.05035	0.58441	0.0946
6	2.79999	1.26495	1.01624	1.92413	1.62659	1.42212	0.22736	0.73242	1.81122	1.75781	1.16425	0.914	0.42572	0.36774	0.19836	0.17853	0.59509	0.3006	0.47607	0.47913	0.45471	0.49744	0.48523	0.42877	2.87933	1.2085	1.85089	2.21405	2.12402	1.79749	1.87531	2.32697	2.36969	2.80609	3.6377	2.66113	1.08032	0.56152	0.31433	0.6073	0.56305	0.46082	0.52032	0.94299	0.83008	0.61646	0.68054	0.60425
7	3.16772	1.93787	1.92413	1.41754	1.43585	1.52893	1.44653	1.24664	1.51062	0.97046	1.79291	1.82495	2.58179	0.90027	1.9104	1.88446	1.86157	1.53656	1.07727	1.48621	1.3092	1.49689	2.06146	1.09406	1.59912	1.14136	1.45721	1.3382	1.01166	1.35498	0.78583	0.38605	0.74615	0.19266	1.13373	0.85297	1.81274	2.26746	2.24152	1.89056	2.00958	2.33765	1.89209	1.81732	1.45874	1.73492	2.03705	1.63727
8	5.74188	2.3407	2.00806	4.6524	2.21863	2.58484	2.23083	1.77307	2.46735	2.46735	2.52075	1.61133	0.78278	0.65308	0.59967	0.58136	0.50964	0.55237	0.4837	0.354	0.5127	0.5661	0.35706	0.4837	0.79193	0.67596	0.62866	0.81024	0.81024	0.57068	0.62103	0.77057	0.81329	0.74463	0.80261	0.59967	1.6037	0.97961	0.60425	0.27161	0.05951	0.22278	0.83618	0.33264	0.4364	0	0.78278	0.02899
9	0.76752	0.89111	0.86823	0.82245	0.81024	1.13678	0.85499	0.69427	0.8255	1.02081	0.80109	0.61035	1.86157	1.14899	1.40076	1.4267	1.18256	1.04218	0.8728	0.74158	1.03912	0.70801	1.0498	1.06659	0.06714	0.06409	0.07019	0.06409	0.04272	0.06256	0.04272	0.06866	0.05951	0.02289	0.06866	0.14496	2.30865	1.89056	1.8158	1.42365	1.52893	1.90277	1.0437	2.07672	1.74103	1.28326	1.47247	1.00098
10	0.95062	0.65155	0.46539	0.75989	0.72174	0.69885	0.61188	0.66528	0.80872	0.43793	0.79346	0.45013	2.18811	0.66681	0.45624	1.17798	1.24054	0.02289	0.58136	0.77667	1.46179	0.67596	1.07269	1.00555	0.99182	0.66223	0.81635	1.12152	0.84991	1.06506	0.50964	0.8316	0.73242	1.12457	0.55389	0.88501	1.15204	0.80414	0.88959	0.9964	1.03149	0.8667	0.91858	1.06201	1.01166	0.83008	0.78278	0.82092
11	4.24347	1.9043	1.55182	1.39618	1.61285	1.21307	0.87891	2.01111	1.7746	1.80206	1.92413	1.6098	1.67542	1.58691	1.46942	1.65405	1.3031	1.63422	1.30005	1.68915	1.49689	1.36261	1.48926	0.78125	2.40326	0.44098	0.77362	0.60577	0.54321	1.15356	0.74158	1.06812	0.93536	0.73242	1.06506	0.84686	3.53699	2.55585	1.72882	1.45874	1.56708	1.96228	1.33514	0.65308	1.14746	2.40936	1.61743	2.21405
12	2.95258	0.76141	0.91248	1.58081	1.37329	1.61591	1.55182	1.44958	1.5976	1.64948	1.66626	1.62811	0.5127	0.0824	0.18768	0.54474	0.32501	0.35706	0.49896	0.23956	0	0.06866	0.12054	0.51575	1.00708	0.60272	0.87433	0.18866	0.79041	0.98267	0.9201	0.72937	1.35803	1.0788	1.34125	1.23596	1.28632	0.92163	1.17493	0.68207	0.71564	0.42419	0.39368	0.29602	0.80719	0.73242	0.3952	1.01471
13	2.08435	0.53406	0.59357	2.07062	0.07782	1.80054	0.06104	0.61951	0.71106	0	0.50354	0.29144	4.14429	2.15759	1.69373	2.00195	2.17133	2.15912	1.79138	1.96533	1.97906	2.17285	2.44904	2.49023	0.9903	0.83618	0.65918	0.13428	0	0.23193	0.17242	0	0	0	0	0	0.8606	0.48065	0.20447	0.55237	0.42267	0.50354	0.75684	0.40741	0.91858	0.41504	0.72327	0.49438
14	1.15613	0.44894	0.55573	0.82773	0.72781	0.75386	0.87497	0.77619	1.10918	1.04304	1.01813	0.96573	1.16577	0.88806	0.29907	0.51117	0.61951	0.41351	0.67444	0.80109	0.75226	0.84686	0.65918	0.70496	1.12762	1.09863	0.9079	0.97046	1.04523	1.25732	1.0498	0.75684	0.98724	0.84229	0.96741	0.86212	1.33667	0.75836	0.33112	0.61951	0	0.18921	0.05341	0.0946	0.08392	0.02289	0	0.02441
15	1.04218	0.80414	0.77515	0.79041	0.79803	0.79651	0.71564	0.83923	0.76599	0.83008	0.74158	1.08948	0.97504	0.73547	0.70801	1.11084	0.89111	0.84381	0.76141	0.88043	0.75073	0.57068	0.72479	0.94604	1.41754	0.97961	1.17654	1.30768	1.3916	1.15204	0.84534	1.35803	1.32141	1.12462	1.14136	1.64185	1.89514	0.75531	0.74921	0.56305	0.94147	0.69885	0.85754	0.55695	0.71564	0.3006	0.77057	0.95673
16	1.0498	0.67291	0.16174	0.04578	0	0	0	0	0	0	0	0	3.32489	1.91345	1.79749	1.96381	1.73798	2.57568	1.8631	2.30255	2.66876	2.0401	2.88239	2.742	2.57874	2.59552	2.49023	1.87073	0.86823	2.63367	1.71814	1.63116	0.99335	1.58539	2.27356	0.70648	1.14746	0.58746	0.66528	0.77362	0.37842	0.15869	0.63477	0.46692	0.28381	0.24872	0.6897	0.46387
17	2.56195	1.3092	1.23138	1.60065	1.41907	1.71051	1.78375	0.46997	0.76141	1.38855	1.12	1.54266	2.69165	2.33459	2.53906	2.54822	1.33667	2.21252	2.33765	1.84937	2.28424	0.89111	2.22626	1.99127	1.32751	1.33514	1.58691	0.93231	1.25275	0.67596	0.49591	0.20752	0.60272	1.0498	1.09406	0.82245	1.57623	1.01471	0.64392	0.81024	1.36261	1.13525	1.18866	1.40076	0.9491	0.43793	0.43945	0.6012
18	1.4389	0.53864	0.48065	0.5188	0.4776	0.6012	0.81635	0.50507	0.83466	0.61951	0.69733	0.83618	0.44708	0.2655	0.24567	0.22125	0.2121	0.20294	0.18311	0.32806	0.1358	0.06104	0.07477	0.11597	0.55389	0.33417	0.29907	0.40894	0.42114	0.50507	0.23651	0.37231	0.46692	0.43335	0.58136	0.34027	1.22986	1.091	0.91705	1.18408	0.4425	0.68054	0.90485	0.48828	0.58746	0.54932	0.80566	0.53101
19	2.40784	2.08588	2.28729	2.2171	2.00348	1.36566	1.8692	1.85089	2.04468	1.34125	2.15607	1.95618	0.67902	0.68054	0.6134	0.23499	0.02441	0.27618	0.07324	0.20447	0.10376	0.02899	0.03967	0.07477	2.14996	0.93536	0.84381	0.90637	1.05286	0.95673	1.11847	0.86365	1.297	0.7843	1.10321	1.03149	2.23846	1.77765	0.46539	2.01111	0.78125	0.31891	0.36011	0	0	0	0	0
20	1.07422	0.57983	0.33417	0.93079	0.57526	0.19531	0	0.02747	0.09918	0.04272	0.11597	0	0.09155	0.13885	0.06256	0.1709	0.15564	0.07629	0.03204	0.08545	0.12665	0.03357	0.14496	0.05188	0.97198	1.10626	1.06354	0.50201	0.71411	0.66833	0.44708	0.46082	0.32349	0.54932	0.19226	0.08392	0.99182	0.76141	0.6424	0.4303	0.19226	0	0.18921	0.21973	0.07477	0	0.06714	0.02136
21	1.69525	1.37482	0.80872	0.93689	0.99487	0.79803	1.31989	1.08185	1.0437	0.72632	0.59967	0.93231	1.28632	0.36163	0.70953	0.9079	0.74921	1.26495	1.51825	0.87891	0.29144	1.01929	1.21613	1.09558	1.58081	1.20391	1.40686	1.00097	1.12609	0.96893	0.55084	0.65765	0.8728	1.01318	1.08489	0.53558	1.30615	0.83466	0.66528	0.67902	0.66986	0.70343	0.49286	0.14343	0.26855	0.60577	0.72632	0.66986
22	1.15662	0.41199	0.59509	1.02539	0.91248	0.46997	0.91095	0.7019	0.78735	0.99182	0.96588	0.52643	0.90332	0.61646	0.41656	0.41199	0.39215	0.14801	0.20294	0.49896	0.28534	0.12817	0.33875	0.06104	0.6958	0.71868	0.27008	0.47454	0.59509	0.6958	0.68359	0.82092	0.58441	1.07269	0.69122		1.95159	0.46844	0.66986	0.80261	0.86212	1.03302	0.89721	0.60424	0.88806	0.77667	0.6134	0.7431
23	2.08588	1.81122	1.65253	1.44348	1.62506	1.71051	1.57928	1.31836	1.75476	1.37939	1.84784	1.80817	1.01318	0.76599	0.69122	0.8255	0.64697	0.83618	0.67749	0.52948	0.72327	0.42267	0.53406	0.46844	1.10626	0.29907	0.50354	0.46539	0.36163	0.56152	0.57525	0.30364	0.59356	0.61035	0.37536	0.51574	1.12762	0.43487	0.33569	0.37384	0.33874	0.30517	0.39062	0.38299	0.33416	0.31127	0.49743	0.36773
24	0.5722		0.15411	0.33112	0.20447	0.05035	0.38452	1.14648	0.54016	0	0.07172	0.20599	1.24817	0.74768	1.00708	1.02234	0.97351	1.21155	1.13373	1.17035	0.85754	1.26343	0.97504	0.66223	0.73699	0.57373	0.46081	0.75836	0.68511	0.57067	0.15106	0.37078	0.46234	0.30364	0.58288	0.39367	1.02996	0.74462	0.80718	1.48315	0.78277	0.67749	0.7843	0.84991	0.79498	0.61798	0.77972	0.88653
25	0.85906	0.54321	0.56915	0.60729	0.75683	0.66223	0.58135	0.531	0.69274	0.66833	0.69732	0.62255	1.3855	1.0498	0.8667	1.02692	0.73853	1.11694	1.07422	0.84839	1.30768	0.5127	1.28021	0.89111	1.24816	0.85601	0.9613	1.08337	0.94451	0.90637	0.83465	0.70648	1.06201	0.84533	0.97045	0.91075	0.40588	0.36926	0.34027	0.33722	0.32806	0.4364	0.2655	0.21057	0.38452	0.34485	0.41351	0.31586
26	0.9903	0.80566	0.51422	0.76599	0.62408	0.68817	0.42419	0.67749	0.69885	0.69275	0.73853	0.61646	1.03912	0.59814	0.75378	0.8667	0.59052	0.57678	0.27618	0.23346	0.05035	0.06104	0.09308	0	0.90027	0.97656	0.42572	0.50507	0.76752	0.64697	0.48676	0.75836	0.31738	0.67749	1.13373	0.86975	0.71564	0.24567	0.42267	0.37842	0.46692	0.37384	0.40283	0.30823	0.41351	0.24719	0.28839	0.35248
27	0.50049	0.28992	0.40436	0.42419	0.27466	0.40283	0.55084	0.43793	0.34332	0.53711	0.55542	0.54779	0.73395	0.39368	0.56152	0.28076	0.518	0.68817	0.45013	0.68054	1.11237	1.09406	0.54321	0.90332	0.43793	0.2655	0.29449	0.32654	0.32196	0.37537	0.31281	0.32196	0.4776	0.31281	0.33875	0.32196	0.59754	0.17791	0.13429	0.24169	0.25177	0.23498	0.1947	0.21485	0.56397	0.46662	0.44983	0.24506
28	0.45319	0.4715	0.37231	0.45319	0.44708	0.14801	0.13733	0.32959	0.1709	0.19836	0.10223	0.1358	0.96436	0.87891	0.85297	0.8728	0.61493	0.88959	0.43945	0.3952	1.06812	0.77972	1.1261	0.73242	0.24872	0.24872	0.16632	0.26398	0.26703	0.25482	0.13428	0.31433	0.20294	0.22125	0.28381	0.30823	0.62714	0.57678	0.25787	0.84076	0.57526	0.37689	0.75684	0.59357	0.56152	0.47913	0.53101	0.2655
29	0.67596	0.5661	0.46539	0.46997	0.383	0.31433	0.24719	0.14496	0.3418	0.20905	0.40894	0.383	1.5274	0.21973	0.53101	0.63324	0.62256	0.50964	0.46997	0.59052	0.56	0.56	0.88501	0.63782	0.21057	0.09613	0.12054	0.16327	0.13123	0.1236	0.14954	0.18311	0.15259	0.15717	0.16937	0.10529	3.36914	0.98877	0.67749	1.33362	0.89722	0.92316	0.99945	1.01929	1.04523	0.91858	0.94757	1.0498
30	0.23804	0.48065	0.67291	0.05188	0	0	0.25024	0.02594	0	0.33417	0.0946	0	0.67596	0.16632	0.12512	0.24567	0.09766	0.09308	0.0473	0.19989	0.10986	0.09308	0.03967	0.04578	0.84534	0.41656	0.66986	0.9491	0.82855	0.59357	0.76752	0.79498	0.94452	0.76447	0.63477	0.82855	0.9491	0.88959	0.67596	0.07935	0.49133	0.37231	0.02594	0.19836	0.3952	0.41504	0.03967	0.36621

## Sheet: CS_cond
subj	aPFC															sham															OC															dlPFC
	Trial 1	Trial 2	Trial 3	Trial 4	Trial 5	Trial 6	Trial 7	Trial 8	Trial 9	Trial 10	Trial 11	Trial 12	Trial 13	Trial 14	Trial 15	Trial 1	Trial 2	Trial 3	Trial 4	Trial 5	Trial 6	Trial 7	Trial 8	Trial 9	Trial 10	Trial 11	Trial 12	Trial 13	Trial 14	Trial 15	Trial 1	Trial 2	Trial 3	Trial 4	Trial 5	Trial 6	Trial 7	Trial 8	Trial 9	Trial 10	Trial 11	Trial 12	Trial 13	Trial 14	Trial 15	Trial 1	Trial 2	Trial 3	Trial 4
1	0.12207	0.31433	0.383	0.3952	0.2243	0.15564	0.2533	0.05951	0.05493	0.07324	0.1144	0.04294	0	0.11902	0.06524	0.09918	0.39825	0.2533	0	0.56763	0.22736	0	0	0	0.23651	0.37842	0.26855	0	0.49438	0.07629	1.54724	1.15204	1.22681	0.83008	1.25275	0.0473	1.11237	0.29907	0.33112	1.40076	1.46027	1.23901	0.3067	0.78735	0	0.03204	0.07477	0.1236	0.30365
2	2.10724	2.01416	1.78223	0.71716	0.05798	1.3031	2.58942	1.14441	0.08545	0	0.81024	0.10529	0.02441	0	0	0.16785	0	0.04883	0.23193	0.3418	0.18768	0.10986		0.05035	0.13733	0.20905	0.05951	0.15411	0.11749	0.06104	1.12	0.63019	0.22583	0.52948	0.23804	0.19989	0.23193	0.60272	0.33417	0.54169	0.3418	0.32959	0.86975	0.16327	0.19684	0	0.23346	0	0
3	0.10376	3.49426	1.85852	0.27313	0.0473	0	0	0.07782	0.0412	0	0.0473	0.03662	0	0.66833	0	1.33667	1.10626	0.8667	0.88501	1.04065	1.10321	0.74158	0.97504	0.6485	2.14691	1.07422	0.67596	1.2558	0	0.27618	0.71716	0	0	0	0	0	0	0	0.27771	0	1.61285	0.41046	1.32141	1.39465	0.20752	0	0.16479	0.18311	0.22583
4	2.27661	2.82898	2.11029	1.27716	1.79443	1.29852	1.474	0.77362	0.63171	1.92108	1.58539	0.3479	1.47095	2.24457	0.84076	0.80719	0.68817	0.59357	0.28381	0.54474	0.3418	0.28381	0.08545	0.36316	0.39368	0.1358	0.35553	0.28706	0.41351	0.10223	0.81635	1.13068	0.57983	0.737	0.98877	0.51727	0.22888	0.29449	0.17395	0.14343	0.4776	0.5661	0.42114	0.44556	0.40741	3.95813	3.09601	2.39563	1.77307
5	1.72882	2.70996	1.29089	1.4328	1.54266	0.90485	0.02136	1.13525	1.20087	0.13428	0	1.46027	0.49133	0	0.1358	1.62964	1.21918	1.2207	0.39368	0.85449	0.1297	0	0.58746	0.2533	0.21667	0.48523	0	0	0.05493	0.09003	0.58594	1.19324	0.63782	0.05493	0.56305	0.39368	0	0.09155	0.88501	0.6546	1.29395	0.65918	0.28534	0.02594	0.12054	0.23193	0.30823		0.10529
6	0.02441	2.37579	1.76544	1.19019	0.44861	0.73547	1.6037	0.49591	0.05341	0.59204	1.87378	0.0824	0.43945	1.75476	0	0.27771	0.17548	0.18005	0.35248	0	0.15259	0.18768	0	0.11749	0	0.23956	0	0	0.06866	0	3.26691	2.61383	2.5116	1.94244	1.88904	0	3.24554	1.66931	1.66321	0.46082	1.091	0.47607	0.03357	0.74005	0.02441	0.9201	1.62811	1.32294	0.75836
7	1.17035	0.98267	0.51727	0.89111	1.71509	0.04272	1.40839	1.56708	0.75684	0.45471	0.41046	1.77917	0.61035	0	1.08185	0.45624	1.54419	0.73853	0.91858	0.3891	0.61035	0.51422	1.59149	0.354	0.88959	0.10071	0.45013	0.43488	0.28687	0.32043	0.23956	1.67999	0.31891	0.81635	0.37842	0.31738	0.20294	0.354	0.141911	0.49438	0.02289	0.57983	0.177	0	0	2.5238	0.27313	0.85297	0.87585
8	0.36774	2.82593	1.53961	0.48828	0.06714	0.41656	0.66376	0.48065	0.2121	0	0.98572	0.13885	0.1236	0.33722	0	0.27618	0.3067	0	0.16327	0.03662	0.09613	0.0473	0	0	0.02289	0	0	0	0	0	0.75989	0.9552	0.36011	0.92163	0.3891	0.57831	0.46082	0.5249	0.21973	0.0946	0.61646	0.63019	0.50812	0.56305	0.55542	1.6037	1.23291	0.74615	0
9	0	0.65918	0.76752	0.63782	0.64545	0.51422	0	0	0.02747	0	0.0885	0.37842	0	0	0	0.95062	0.71259	0.0946	0.92468	0.5249	0.18311	0.46844	0.37384	0.08392	0.99335	0.69122	0.21515	0.37537	0.78735	0.08698	0.0412	0.04883	0.03357	0.0946	0	0.0412	0	0	0	0	0	0	0	0	0	0.02594	2.05994	0.7019	0
10	0.42877	0.15869	0.65155	0.09003	0.02899	0.5661	0.4425	0	0.10529	0.15259	0.40741	0.06256	0.0946	0.15106	0.08698	0	0.69733	0.39978	0.08087	0.71106	0.25482	0.9552	0.12054	0.0946	0	0	0.06561	0.02441	0	0.02594	0.39978	0.16327	0.72174	0.10681	0.1358	0.70343	0.5127	0	0.2182	0	0	0.53864	0.19836	0.04425	0.18921	0.20447	0.5188	0.14801	0
11	0	0.83008	0.84991	0.8255	2.02789	0.30823	0.1709	1.07727	0.50964	0.27008	0.55695	0.59204	0	0.54932	0.05035	0.02289	0.63629	0.20447	0	0	0	0.20905	0	0	0.07019	0	0	0	0	0	0.5661	0.62714	0.33417	0.82855	0.67902	0.74768	0.12665	0.38757	0.08087	0.43488	0.80414	0.53253	0.32501	0	0.12665	0.56458	0.45319	0.57983	0
12	0.61188	0.91095	1.4679	0.3891	0.68512	0.60425	0.61798	0.11597	0.98572	0	0.03052	0.15106	0	0	0.3006	0.09766	0.06409	0.02289	0	0.03357	0.09918	0.06866	0.06409	0.13428	0.03052	0	0	0.05188		0.20447	1.44653	0.79041	0.35858	0	0	0.11292	0.39978	0.04272	0.80719	0.73242	0.32501	0.21973	0	0.10834	0.16479	0.25024	0.07629	0	0.78583
13	0.27771	0.07629	0	0	0	0	0	0.58594	0.06561	0	0	0	0.03662		0	0.92316	1.7807	1.17035	0.69885	1.12305	0.49438	0.8728	0.63934	1.16882	0.69427	0.81329	1.02692	0.05646	0.48828	0.67291	0.0351	0.05646	0.05646	0	0	0	0	0.10529	0	0	0	0	0	0	0	0.79041	0.93384	0.88501	0.94147
14	0.37079	4.29382	2.72064	1.32141	0.23804	1.77917	0.80872	0.16022	0.12207	0	0.13428	0.55847	0.20142	0.5249	1.60828	1.80206	0.97961	1.32446	0.4776	1.11542	0.97809	1.0849	1.05438	1.10474	1.45111	0.81482	1.20392	0.66071	1.56555	0.72479	1.4679	0.67444	0.58136	0.69122	0.91858	0.90637	0.99945	0.48523	0.0885	0.5127	0	0.11749	0.80109	0.18158	0.48218	0.28229	0	0	0
15	0.45319	0.24567	0.35706	0.29755	0.19379	0	0.15717	0.28687	0.02594	0	0.14191	0.03204	1.2207	0	0.0412	1.75171	0.98419	0.2655	1.01471	0.99182	0.28687	0.15564	0.43488	0.67902	0.58746	0.4303	0.27924	0.10071	0.23041	0.21362	1.41754	0.59509	0.69733	0	0.79803	0	0.65613	1.90125	0.57983	0.05646	0.9491	0.86212	0	0.7019	0.09308	0.88501	0.81177	0.82855	0.5127
16	0.02594	0.23193	0.20752	0	0	0	0		0	0	0	0	0	0	0	0.62408	1.87073	1.92566	0.84991	2.07062	2.31171	1.15967	2.42004	1.11389	1.30615	1.08032	1.15967	1.25275	0.27618	0.58594	0.05341	0.74615	0.03815	0.36011	0.08392	0.15411	0	1.69678	0.0412	0	0	0.51575	0	0	0.84839	0.32654	0.24567	0.27313	0.0885
17	0.15411	0.14496	0	0	0	0	0	0	0	0	0	0	0	0	0	0	0.74005	0	0.41656	0.03815	0	0.17853	0.19989	0	0.03662	0	0	0.03204	0.07019	0	0.2182	0.23193	0.26703	0.16632	0.36316	0	0.14496	0.02594	0	0	0.24261	0	0	0	0	0.11444	1.28326	1.02997	0.02136
18	0.38452	0.82245	0.91858	0.89417	0.57373	0.63629	0.51117	0.19073	0.37384	0	0.27466	0.7843	0	0.6134	0.02899	0.0824	0.05493	0	0	0.07019	0	0	0	0.02289	0	0	0	0.04425	0	0	0.3952	0.19379	0.55389	0.61035	0.23041	0.11139	0	0.29602	0	0.23956	0.11139	0.12054	0.37384	0.02594	0.03204	0.91553	0.23956	0.74768	0.26855
19	0	0.26245	0.54474	0.45776	0.4837	0.40436	0.44861	0.53101	0.62103	0.82397	0.41656	0.15869	0.26855	0.19531	0.4425	0.0351	0	0	0.16022	0	0	0	0.12665	0.02747	0	0	0	0	0.02441	0	1.00708	0.61188	0.56915	1.09406	1.15662	0.71869	0.34332	0.40436	1.45874	0.06256	0.11749	1.12152	0.59967	0.84991	0.81024	1.50604	1.96533	0	0
20	0	0.13885	0	0	0.07172	0.03204	0.14954	0	0	0.0412	0	0.32654	0.06866	0	0.08392	0	0.03967	0	0	0.03357	0.02594	0	0	0	0	0	0	0	0	0	0	0.36926	0.14801	0.06714	0	0.07629	0.02594	0.05646	0	0.04883	0	0	0	0	0	0.39368	0.18311	0.05341	0
21	0.41046	0.76599	0.50964	0.38452	1.23901	0.76904	0.77667	0.31281	0.65155	0.44861	0.84991	0.72632	0.51575	1.03912	0.6958	0.35858	1.29852	0.77057	1.23901	0.27313	0.43488	0.27161	0	0.17548	0	0.25635	0.05493	0.31128	0	0	0.18768	0.98419	0.78735	0.51574	0.34637	0	0.50811	0.49743	0.03509	0	0.04272	0	0.04119	0	0	0.13428	0.14496	0.28992	0.07324
22	0.50812	1.02844	0.46844	0.89722	0.28229	0.06104	1.04675	0.33417	0.80261	1.01776	0.63019	0.14801	0.67139	0.20447	0.85602	0.0412	0.14343	0.54474	0.14954	0.25635	0.09003	0.15717	0.02441	0.03662	0.06104	0	0.11139	0	0.17395		0.35705	0.08392	0	0.22583	0.07629	0.04425	0	0	0	0	0.28381	0	0.07476	0.07629		0.47912	0.94146	1.02386	0.75073
23	0.53864	0.5188	0.44861	1.22986	2.00806	0.98572	0.5188	1.70441	0.31738	0.53406	0.04425	0.97046	0.57526		0.30823	0.28229	0	0.02441	0	0.4776	0	0	0	0	0.06714	0	0	0	0.05798	0	0.26855	1.0086	0.39367	0.94451	0.30212	0.48522	0.32348	0.0946	0.84991	0.14953	0.41503	0.09918	0	0.02288	0.02288	0	1.03912	0.53405	0.85906
24	0.91248	0.90027	0.27618	0.0473	0.17548	0.20752	0.14801	0.07019	0.07324	0.02594	0.70343	0.12054	0	0	0.02899	0.77972	0.80261	0.14496	0.94452	0.75531	0.15869	0	0.4303	0	0.18158	0.17548	0	0.03815	0	0	0.1892	0.62103	0.70495	0.24261	0.14953	0.02593	0.0473	0.04272	0.06408	0	0	0	0	0	0	0.2716	0.68817	0.22735	0
25	0.71411	0.48522	0.25329	0.25024	0.27618	0.24261	0.25024	0.23803	0	0.25024	0.11596	0.23345	0.24261	0.18157	0.25329	0.3067	1.0025	0	0.41504	0.57526	0.28381	0.11292	0	0.20752	0	0	1.20087	0	0	0	0.31433	0.28228	0.36621	0.13427	0.30212	0.16326	0	0.32501	0.27618	0.07934	0	0.0534	0.04119	0.03204	0.02441	0.35858	0.29144	0.08392	0
26	0.40283	0.73547	1.04065	0.63477	0.65765	0.42419	0.67902	0.49286	0.59967	0.70496	0.79346	0.48218	0.44861	0.82703	0.62408	0.52185	0.05493	0	0	0	0	0	0	0.04883	0	0	0	0	0	0	0.49896	0.07324	0.27008	0.05188	0.04272	0	0.14648	0	0	0.14343	0.14648	0.21667	0	0	0.08087	0.23804	0.16937	0.12817	0.09003
27	0.37231	0.37384	0.26855	0.36469	0.36926	0.2121	0.09918	0.14801	0.16327	0.24872	0.0824	0.20294	0.13428	0.29297	0.03815	0.27008	0.31281	0.1358	0.28076	0.30823	0.11292	0.12504	0.04883	0.10071	0.16327	0.02899	0.27313	0.31891	0.72327	0	0.31128	0.18463	0.28534	0.09918	0.177	0.11444	0.14954	0.18921	0.27008	0	0.03204	0.07629	0.10834	0.28534	0.07172	0.21057	0.19684	0.16632	0
28	0	0	0	0.19531	0	0	0	0	0	0	0	0	0	0	0	0.2594	0.09918	0.02136	0.07629	0.16022	0.05188	0.11444	0.10223	0	0.03204	0.07324	0.03052	0.06561	0.05341	0.26703	0.2594	0.14801	0	0.32196	0	0	0.08545	0	0	0	0.16937	0	0	0	0	0.13885	0.13428	0	0.23193
29	0.33112	0.11902	0.07324	0.15259	0.23499	0.13123	0.13428	0.07324	0	0.02136	0.04272	0.02747	0	0.09155	0.03052	0.62714	0.29297	0.32196	0.09308	0.20142	0.0824	0.14954	0.07935	0.19989	0	0.19226	0.02747	0.0351	0.20752	0	0.16479	0.07477	0.07935	0.21515	0.10376	0.11749	0.13885	0.10986	0	0.15106	0.10681	0.07324	0.10071	0.11139	0.09155	0.5188	1.49689	1.07422	0.95215
30	0	0.04425	0	0	0	0	0	0.57068	0	0	0	0	0.64392	0	0	0.06866	0	0.05798	0.05035	0.03357	0	0.03357	0	0	0	0	0	0	0	0	0.46387	0.19989	0.43335	0.30365	0.05951	0.05188	0	0	0.1297	0	0	0	0.03815	0	0	0.41504	0.3479	0.32043	0.09155
[truncated: 11 more columns]
